# Supplementary material
Source: PubMed Central journal article supplement (PMC9709583)

A

EFT

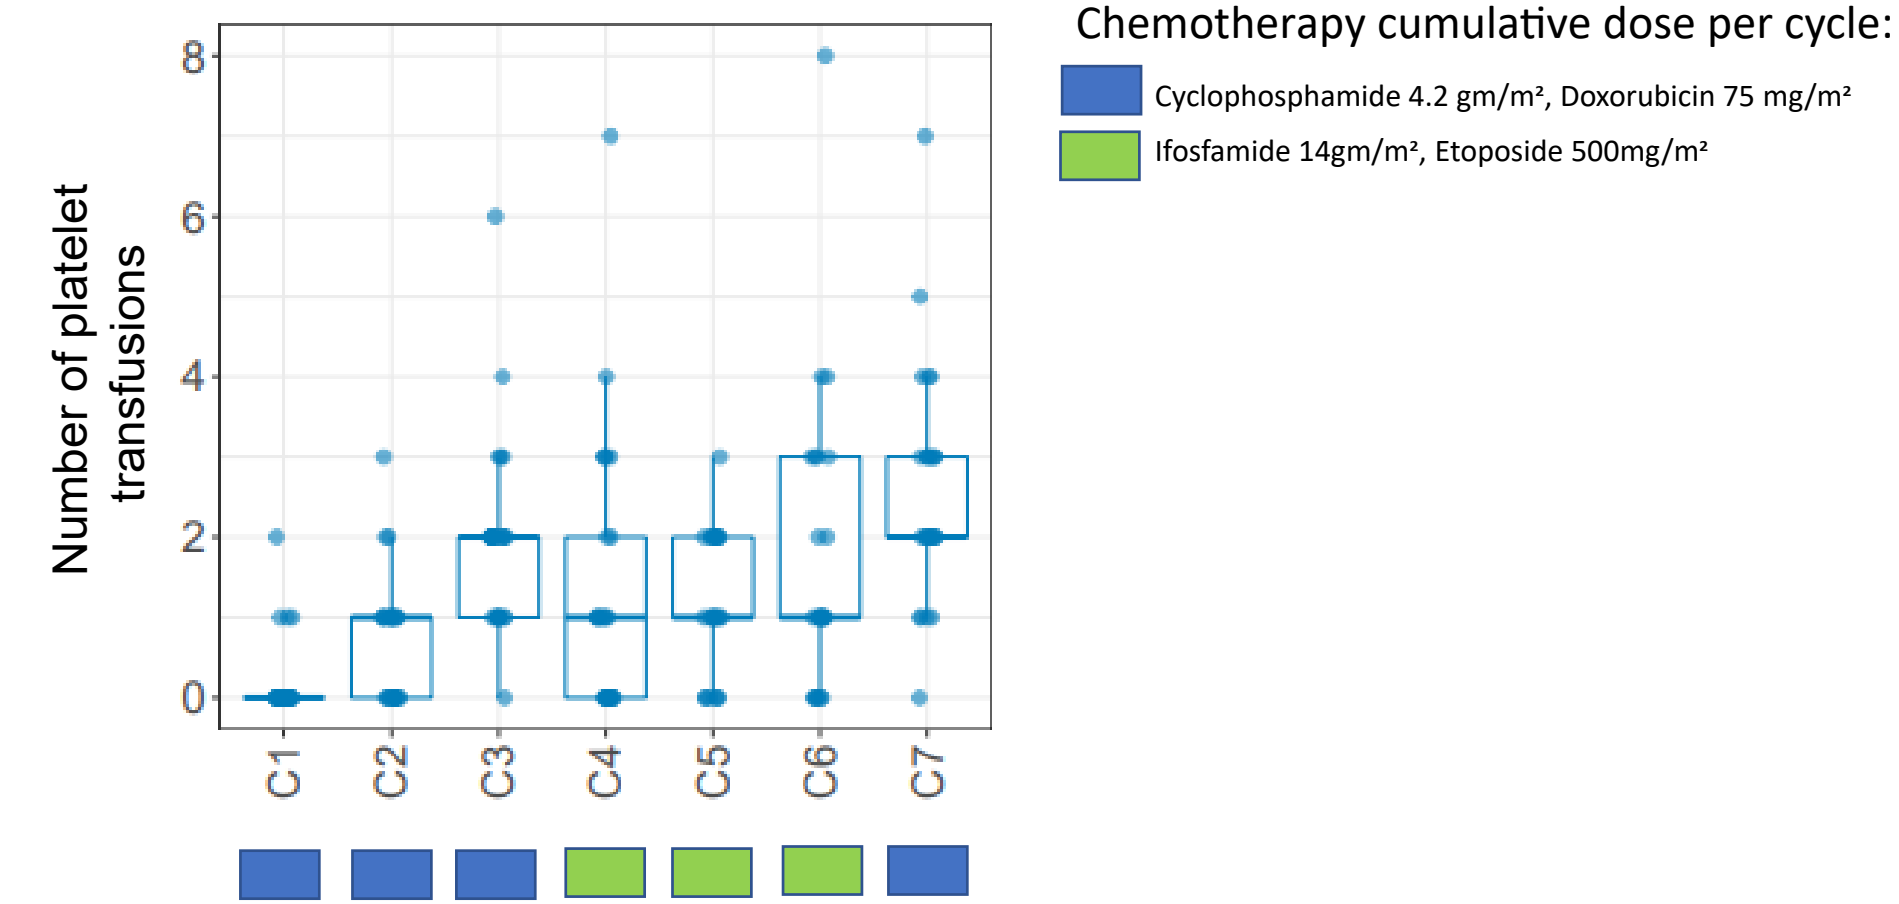

B

N8

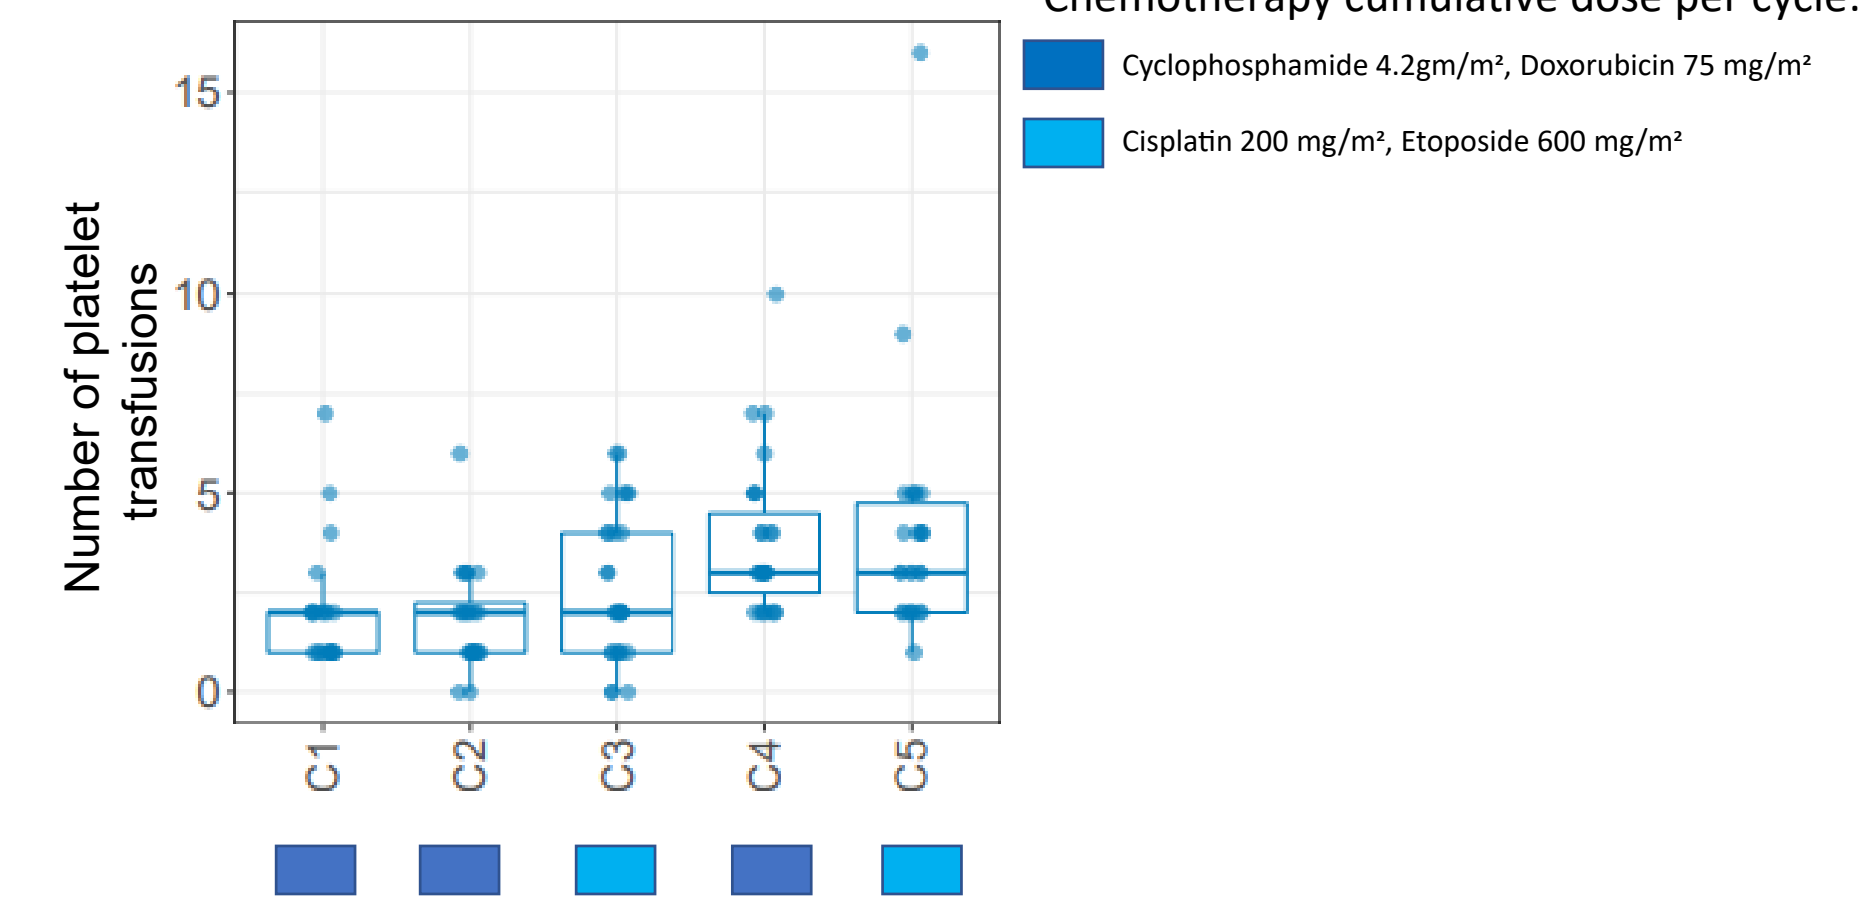

C

03-074/MAP

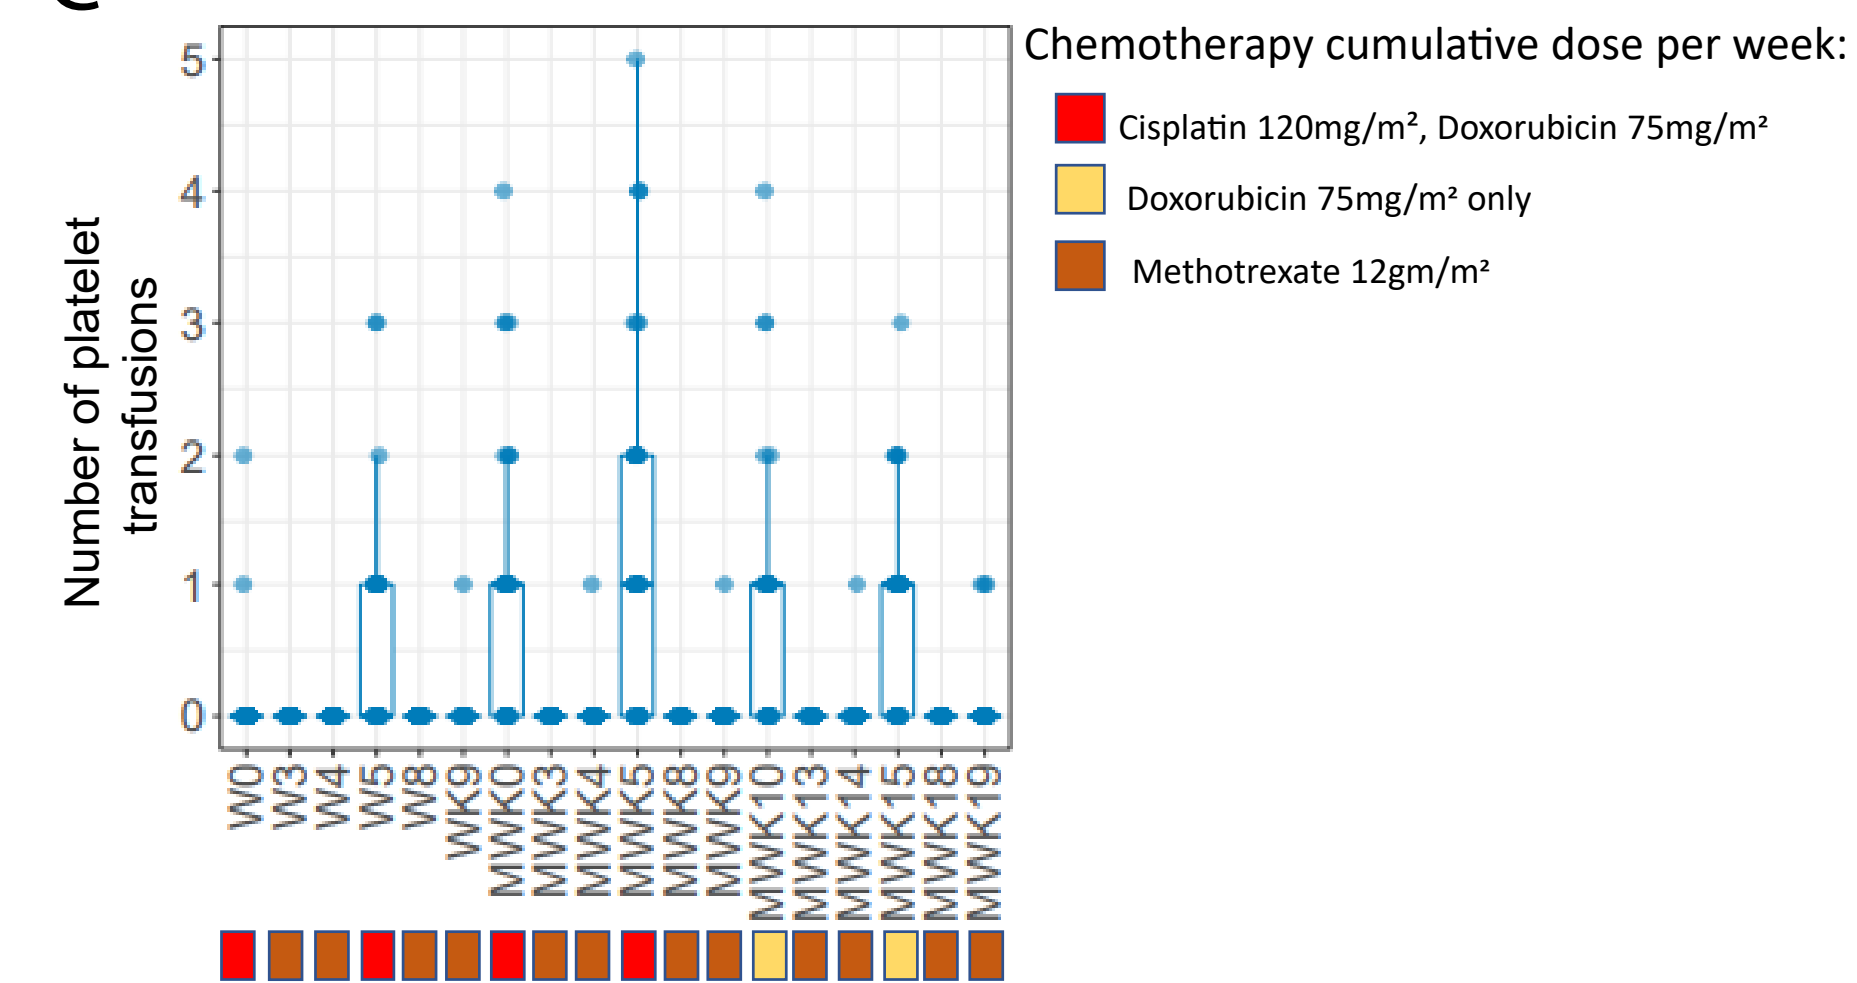

D

03-099

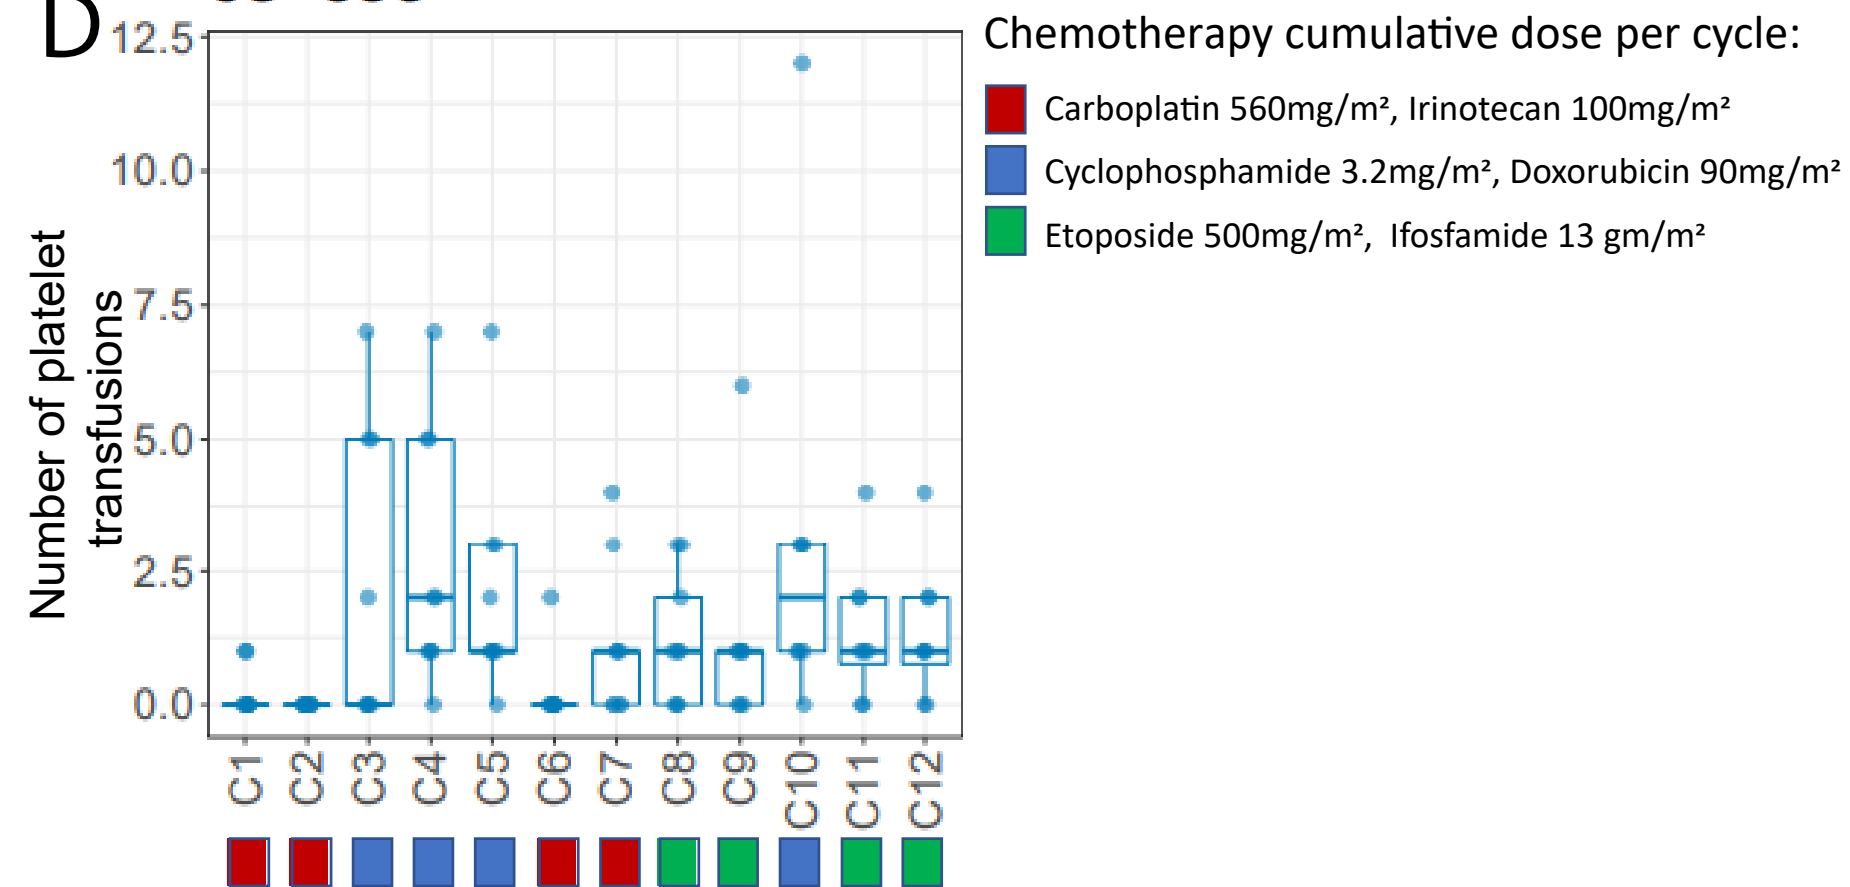

E

D9803

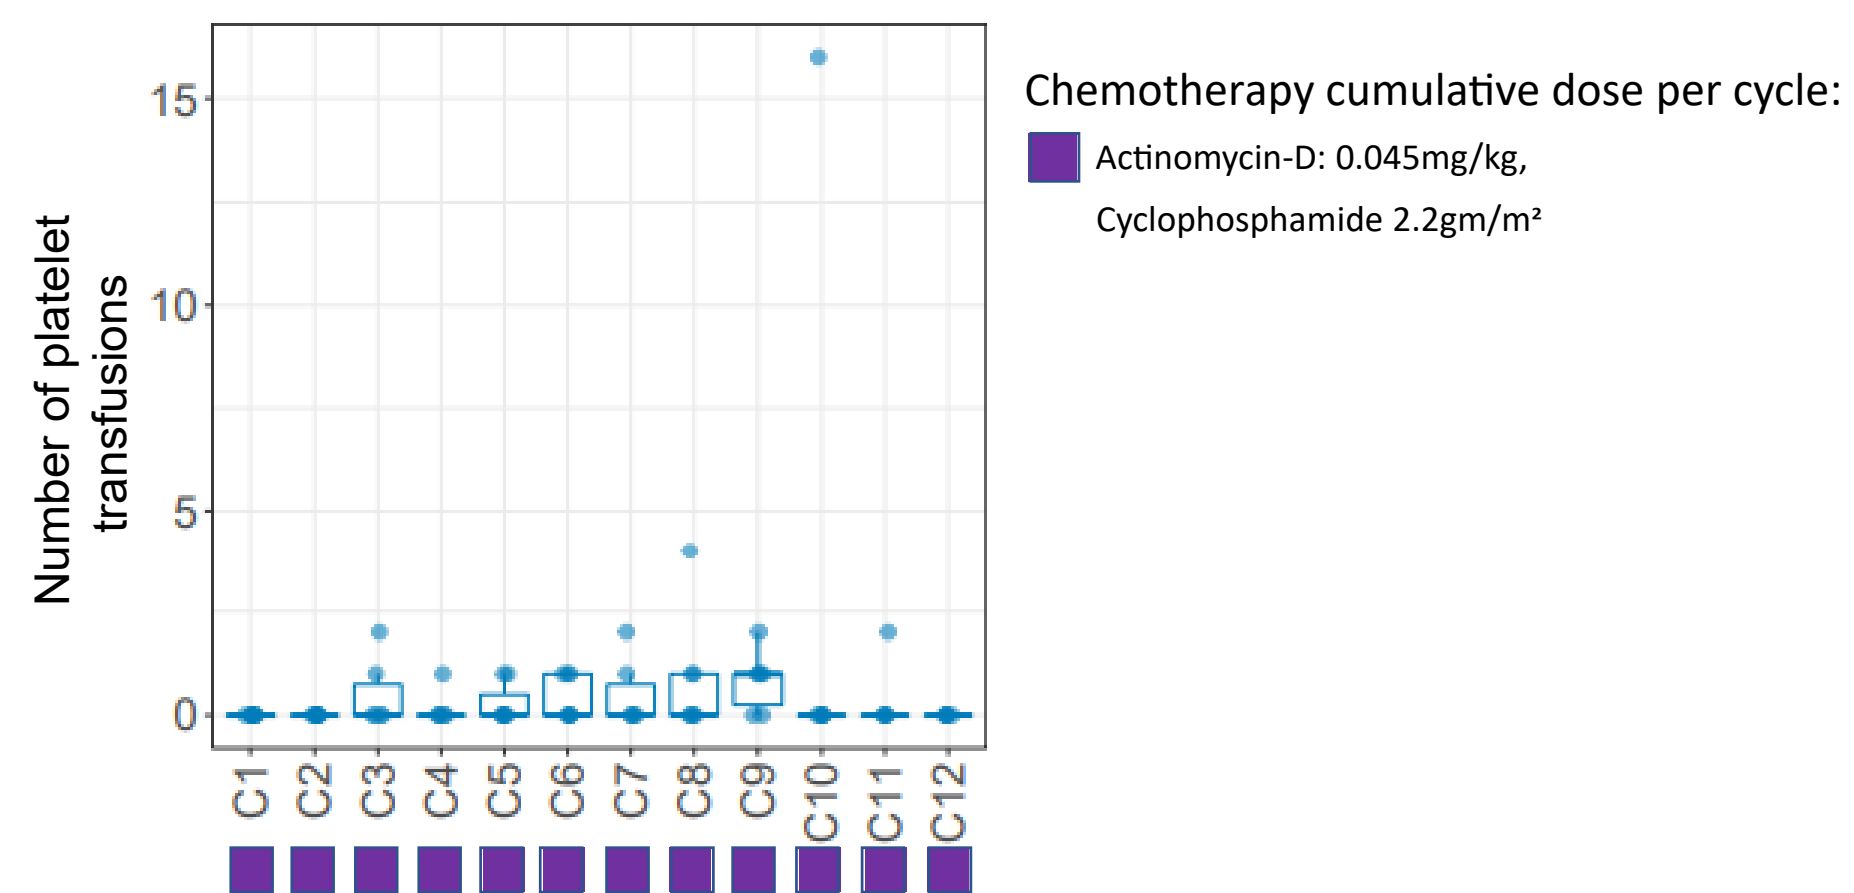

F

ARET0321

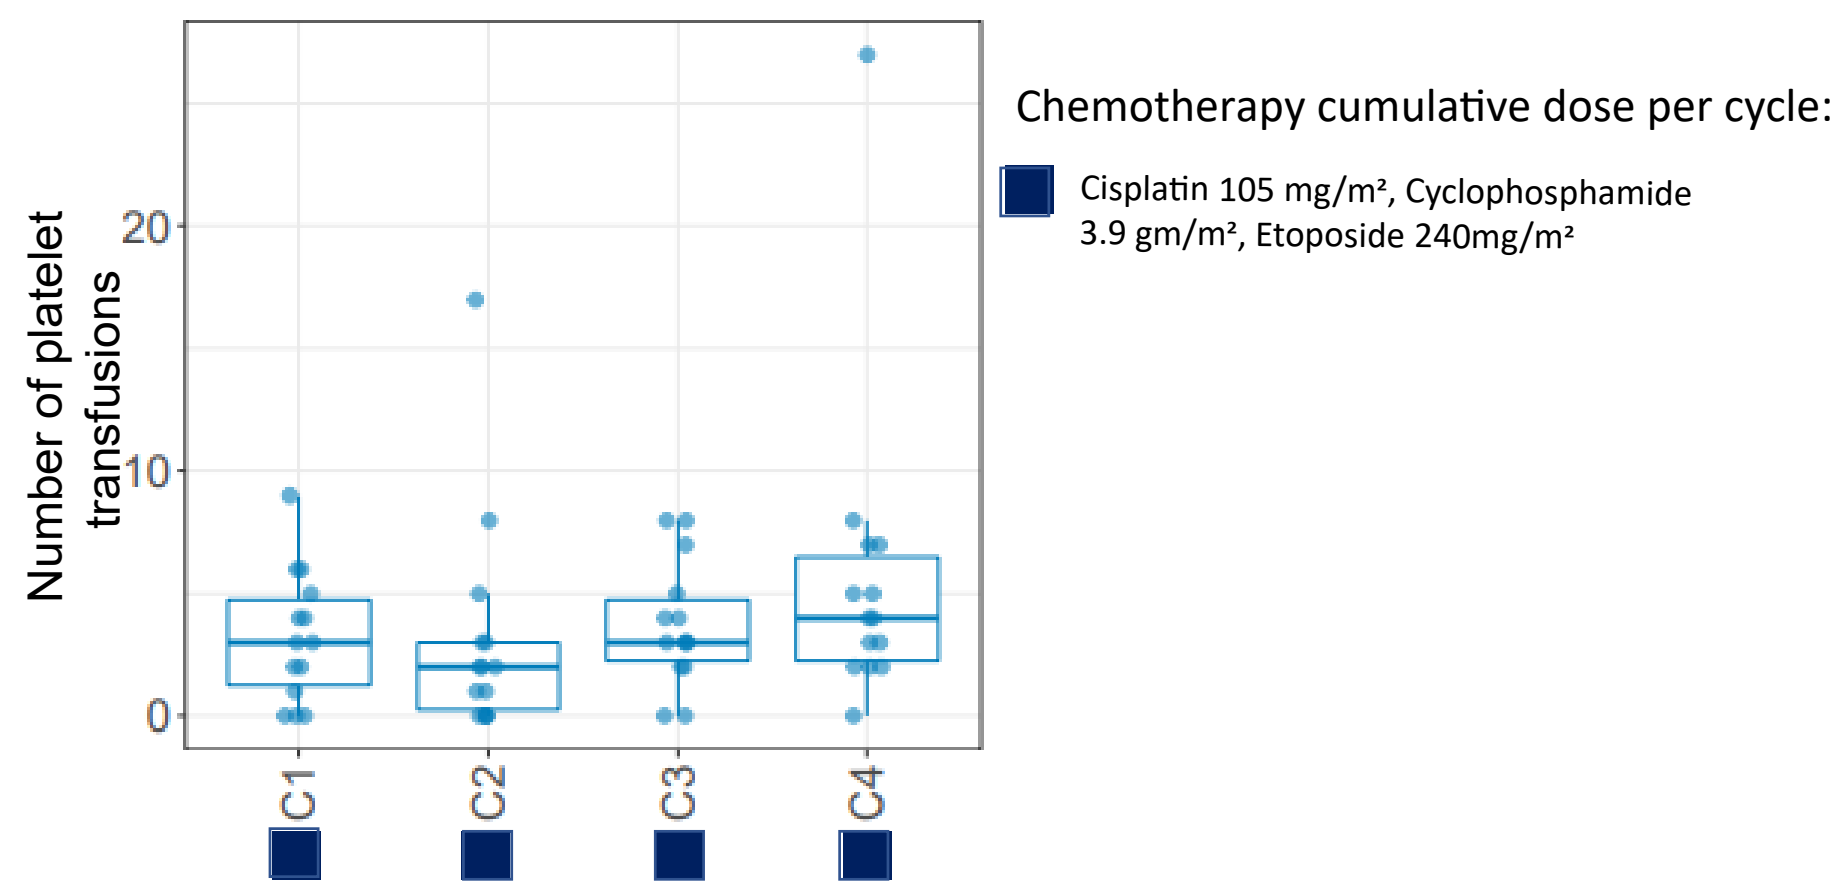

G ACNS0332

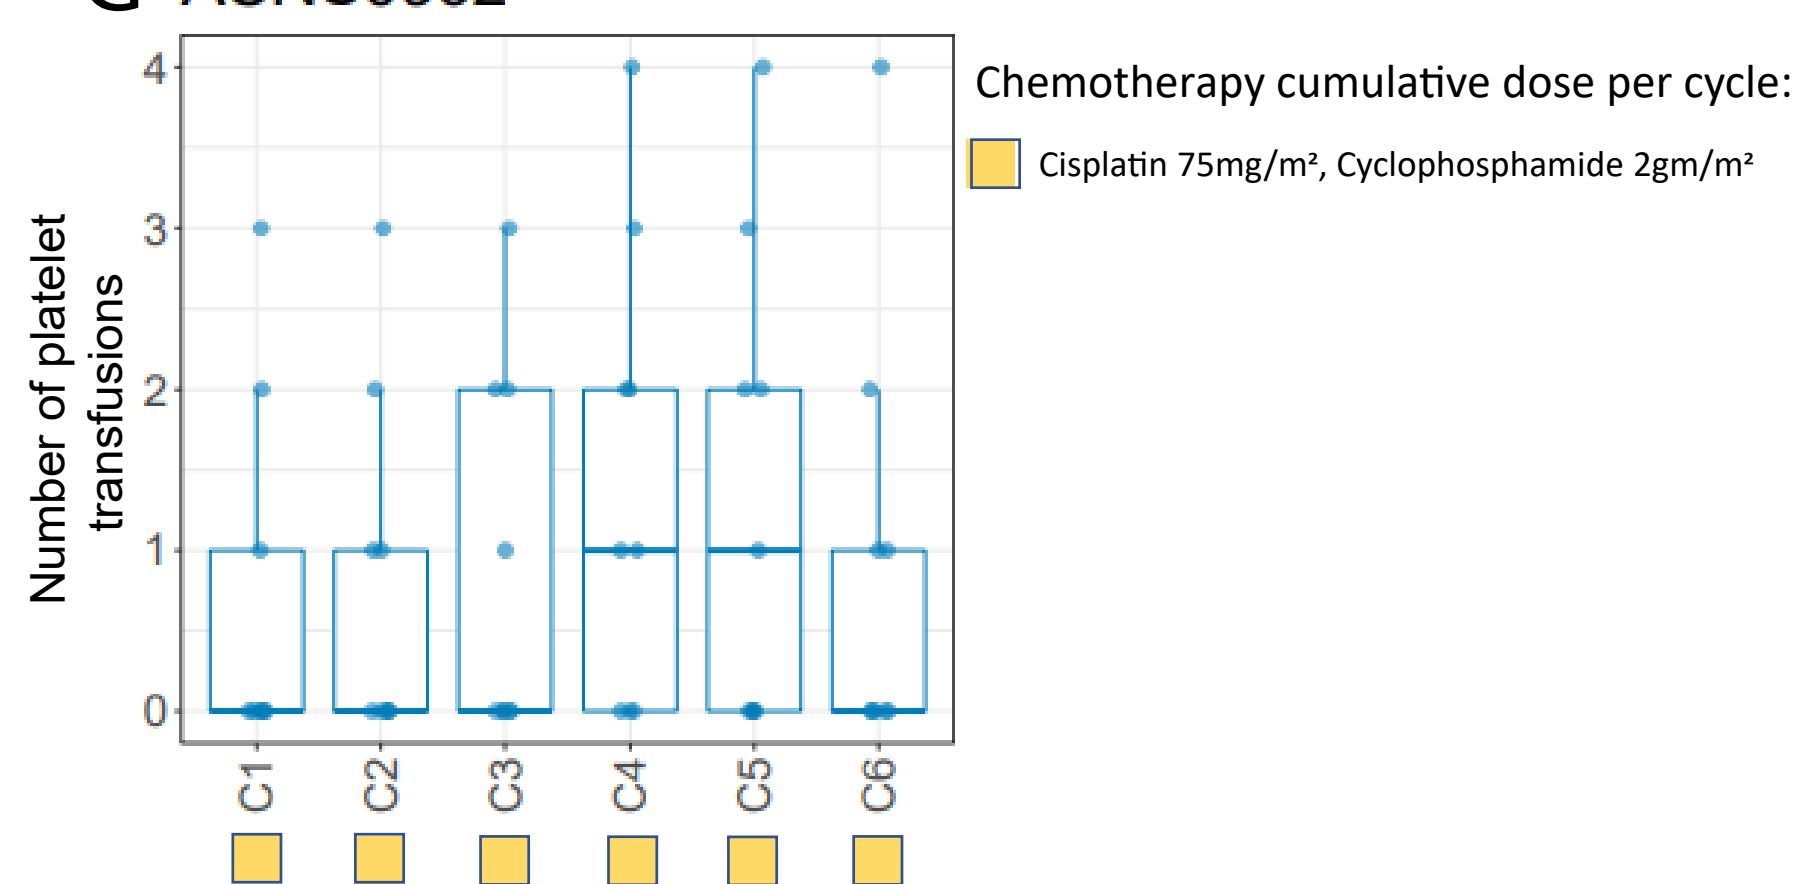

H

ACNS1123 Stratum 1

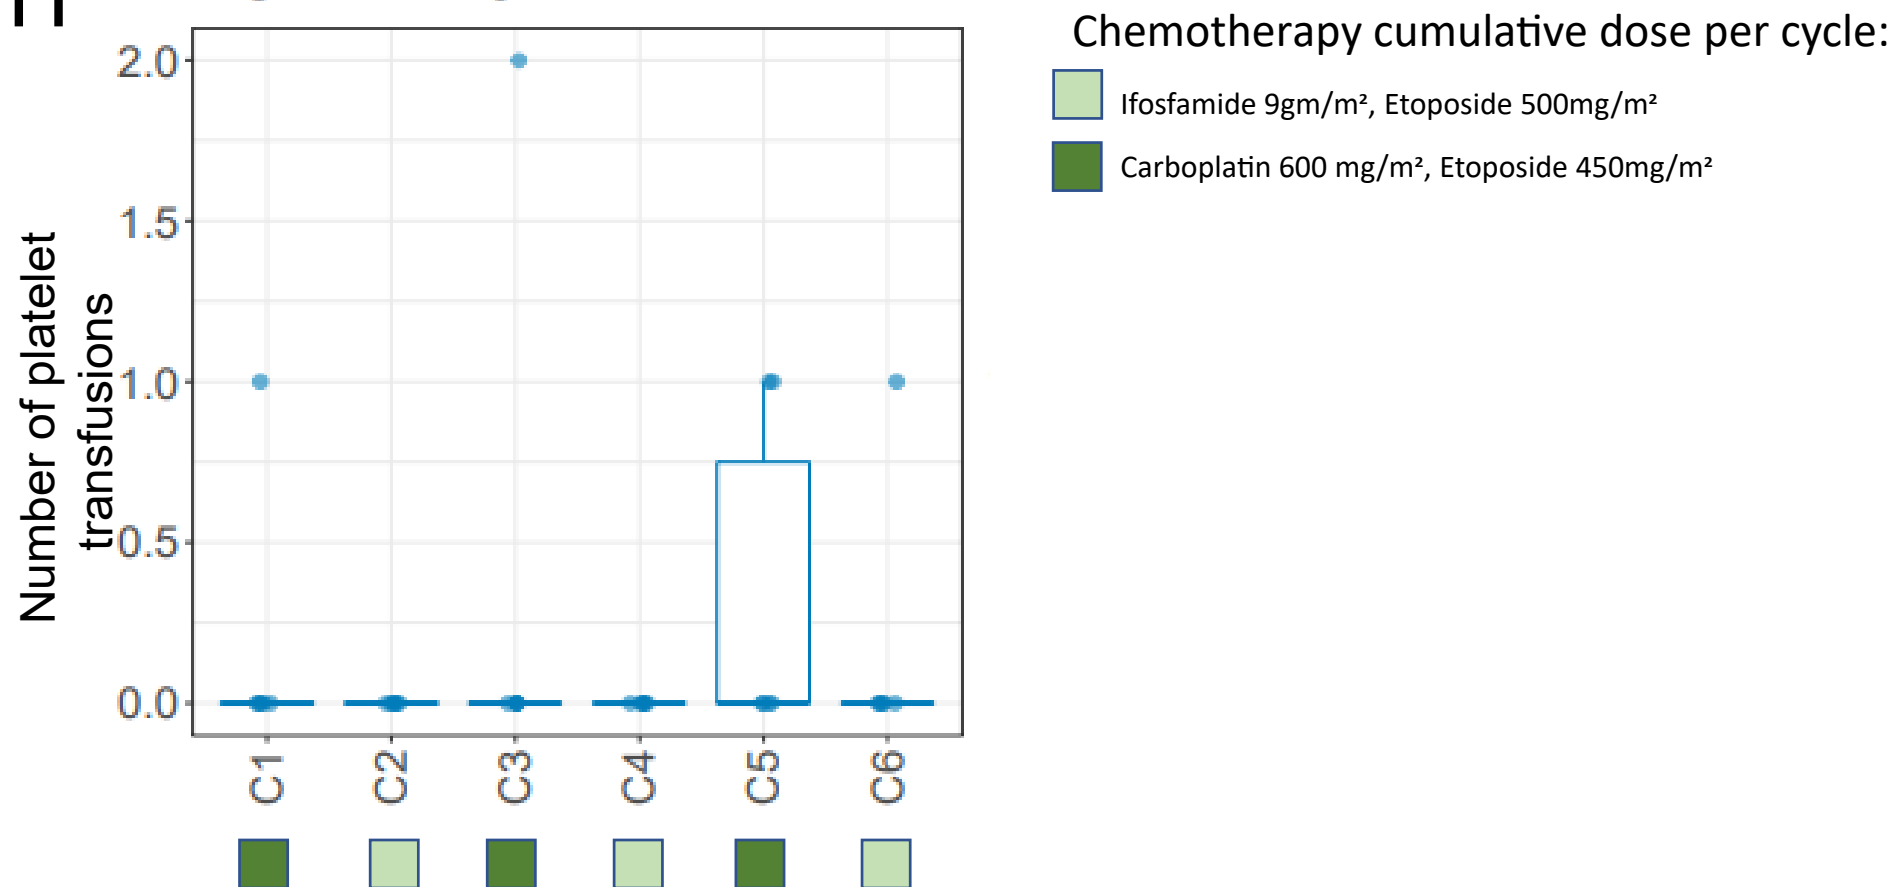

ACNS1123 Stratum 2

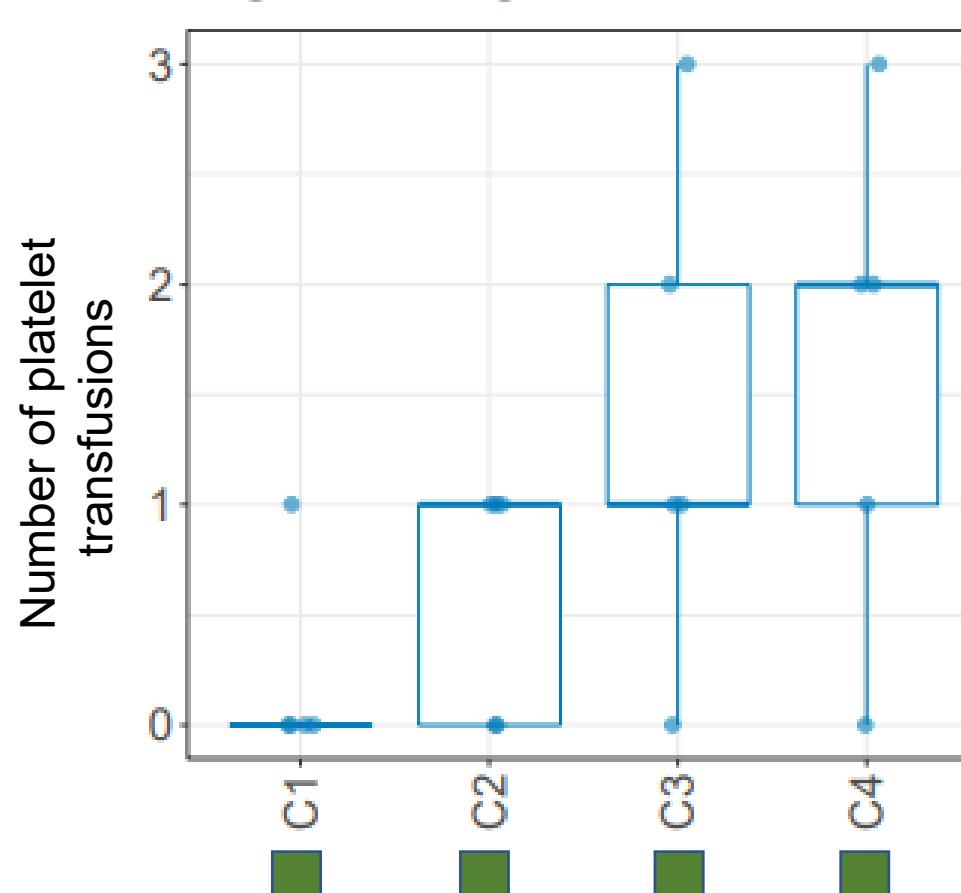

Supplement: NIHMS1803931-supplement-fS1.pdf [file NIHMS1803931-supplement-fS1.pdf]

**03-074/MAP**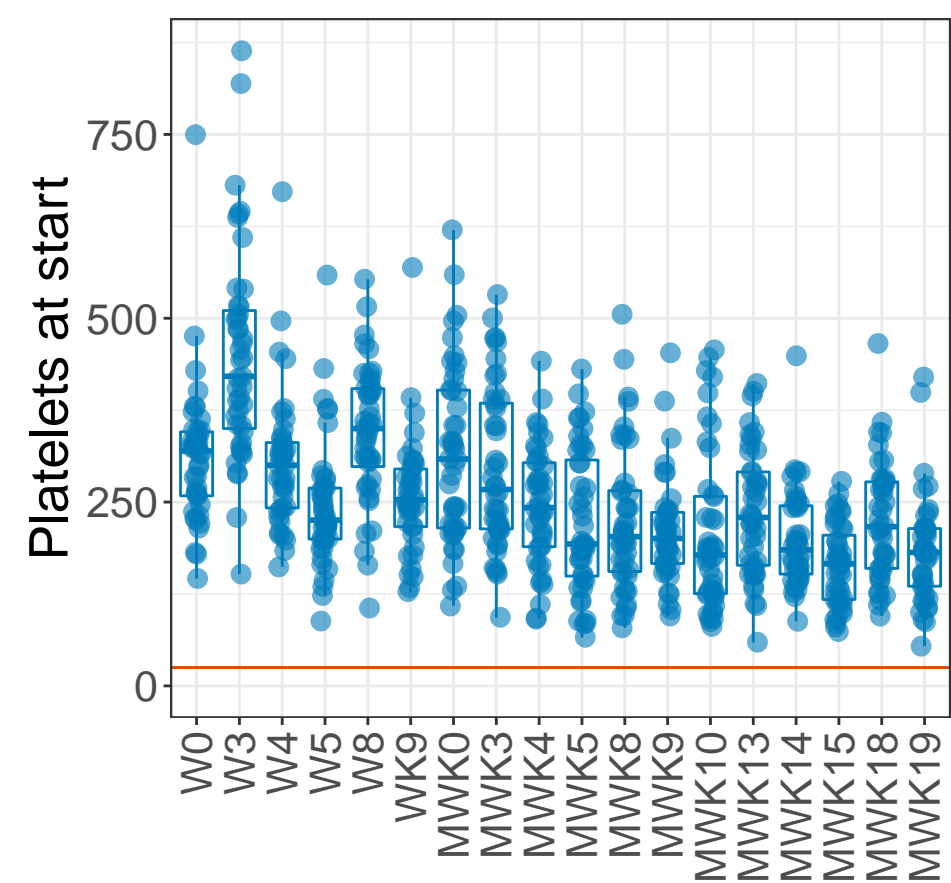**03-099**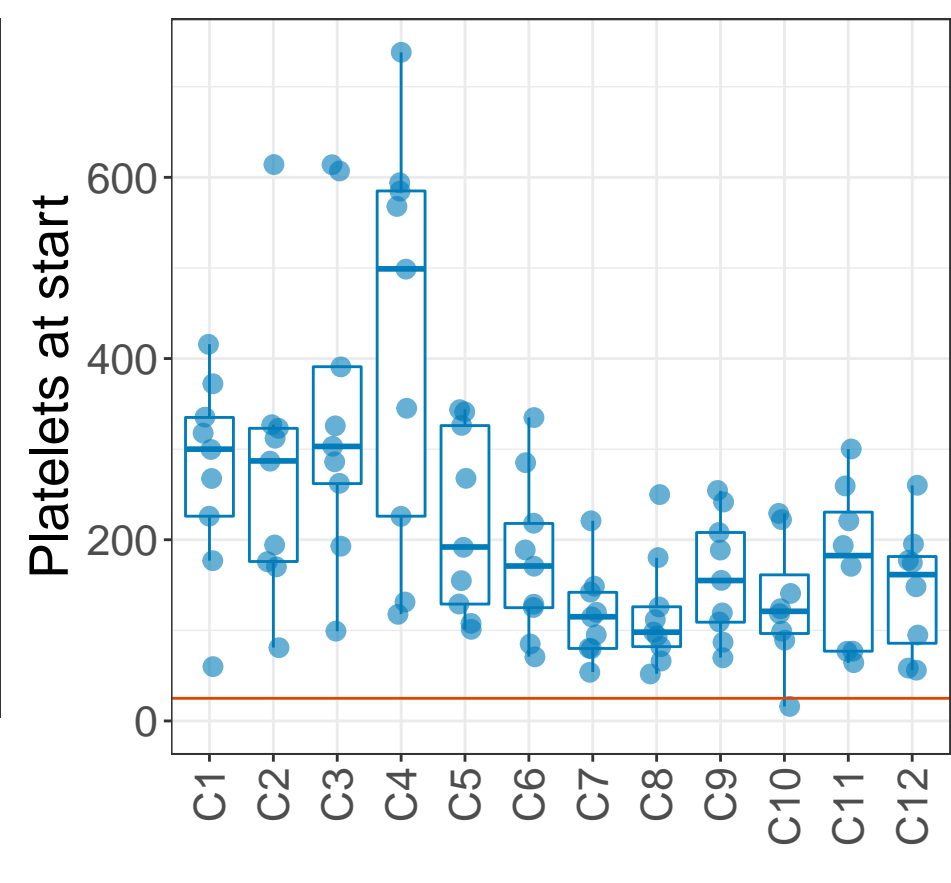**D9803**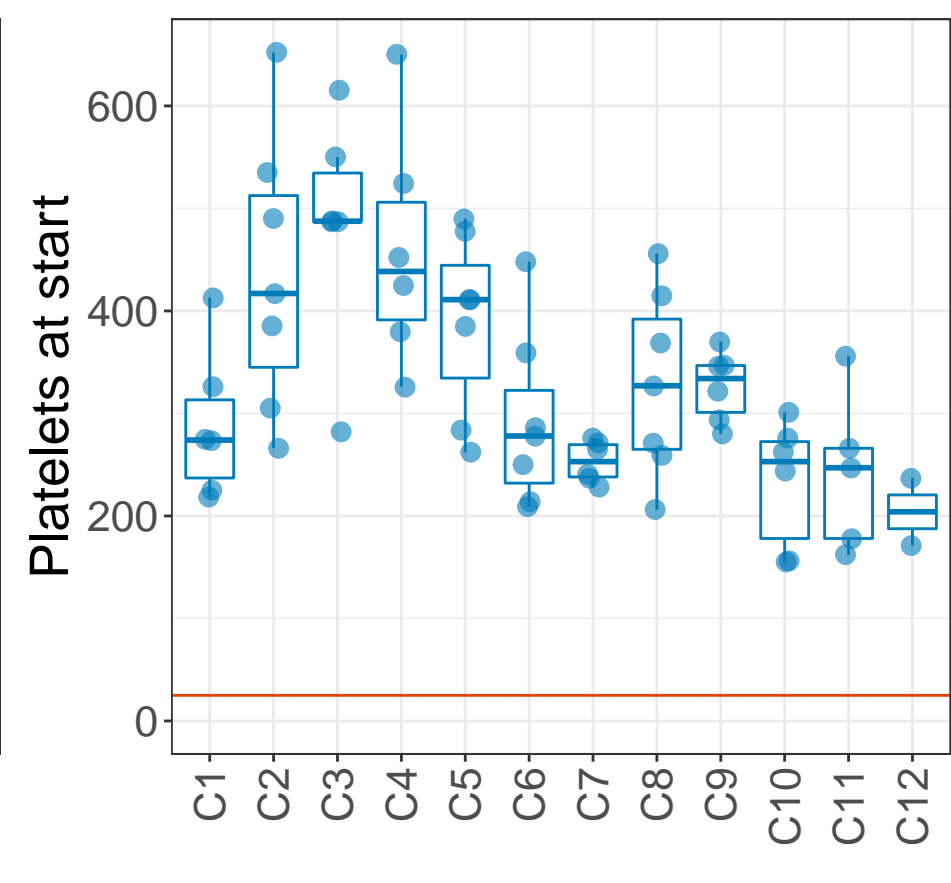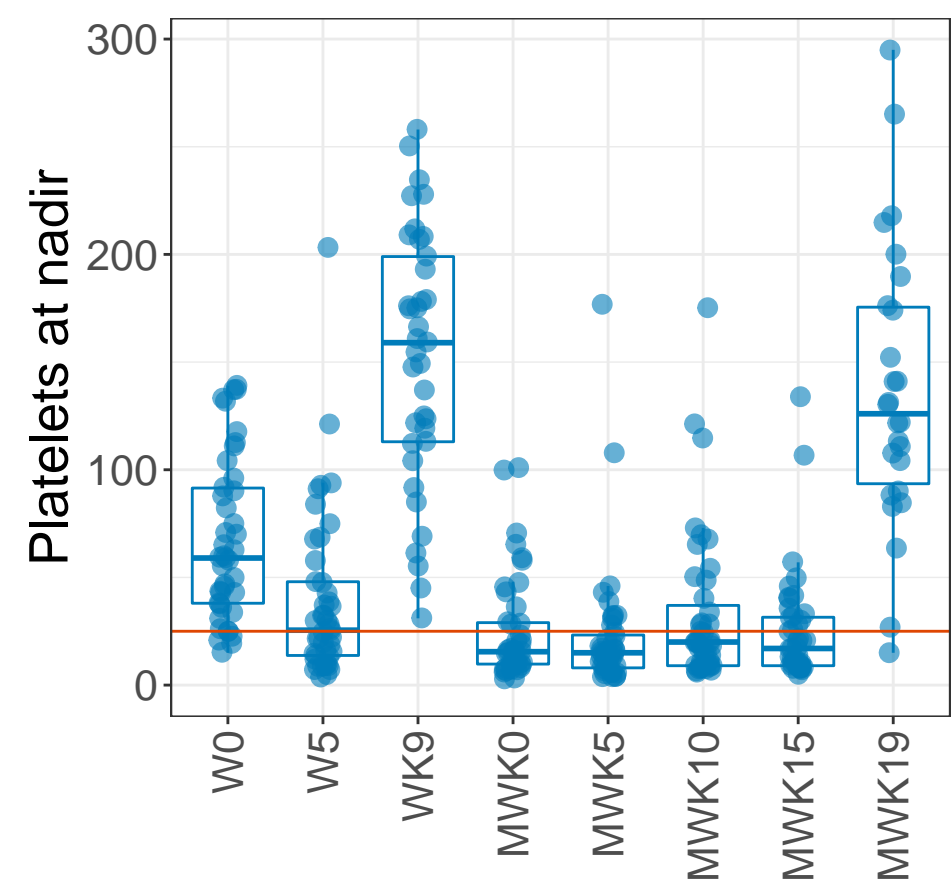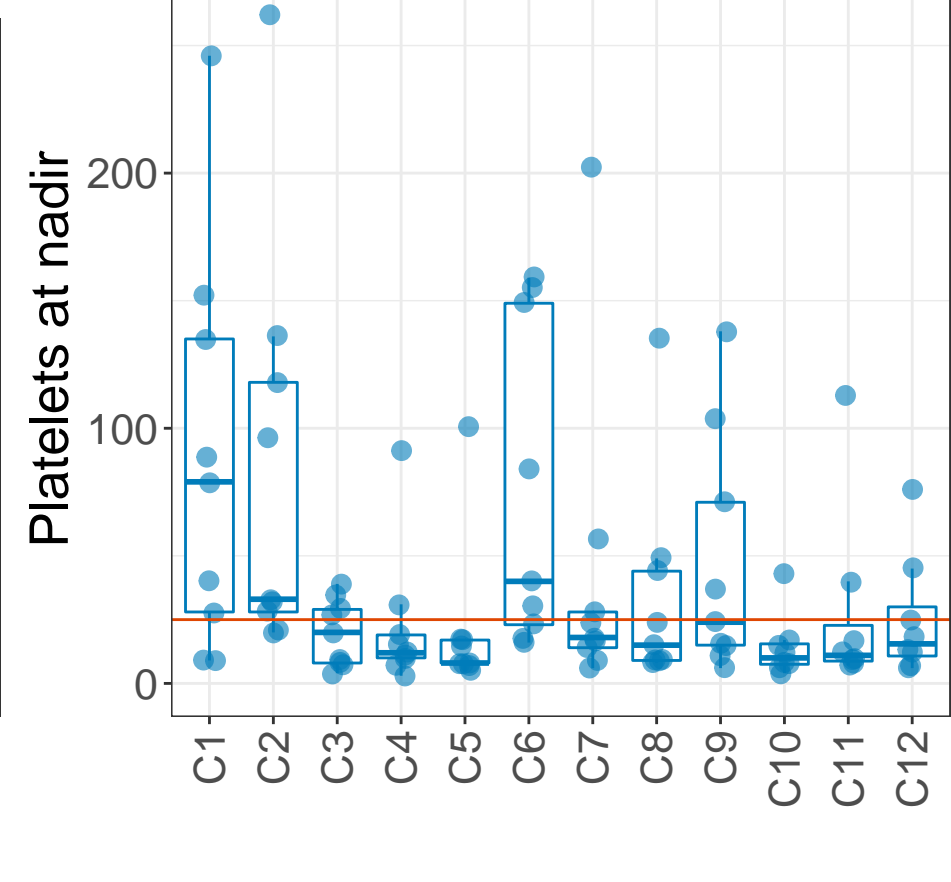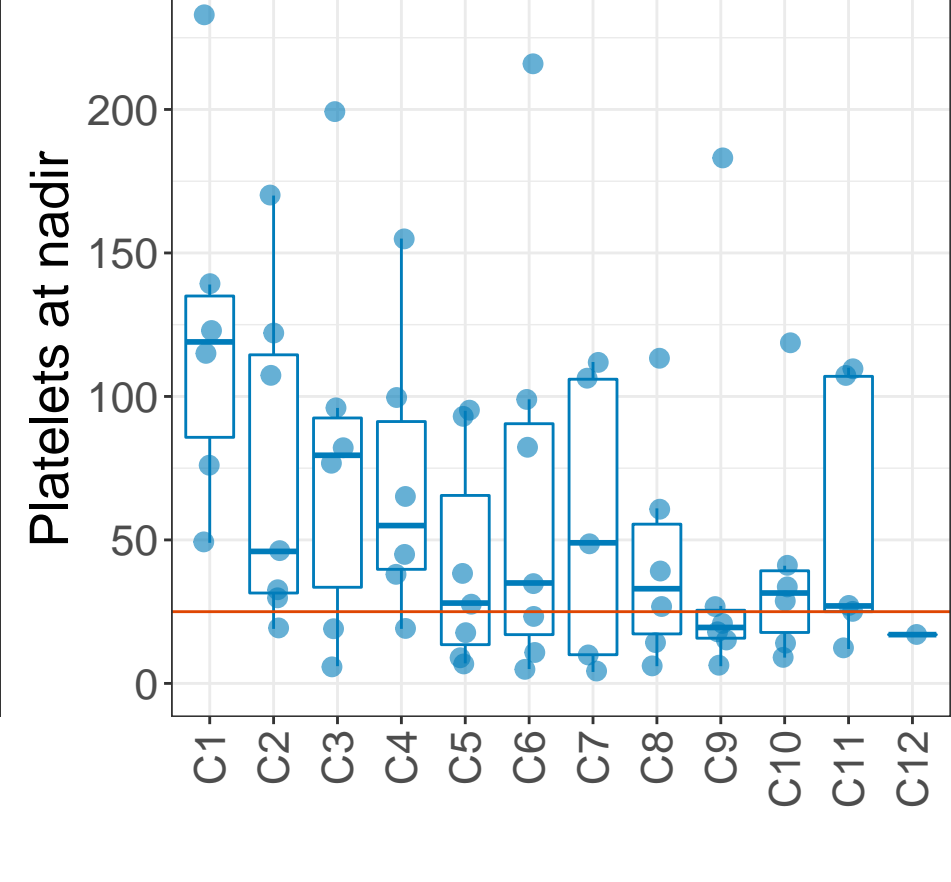**ACNS0332**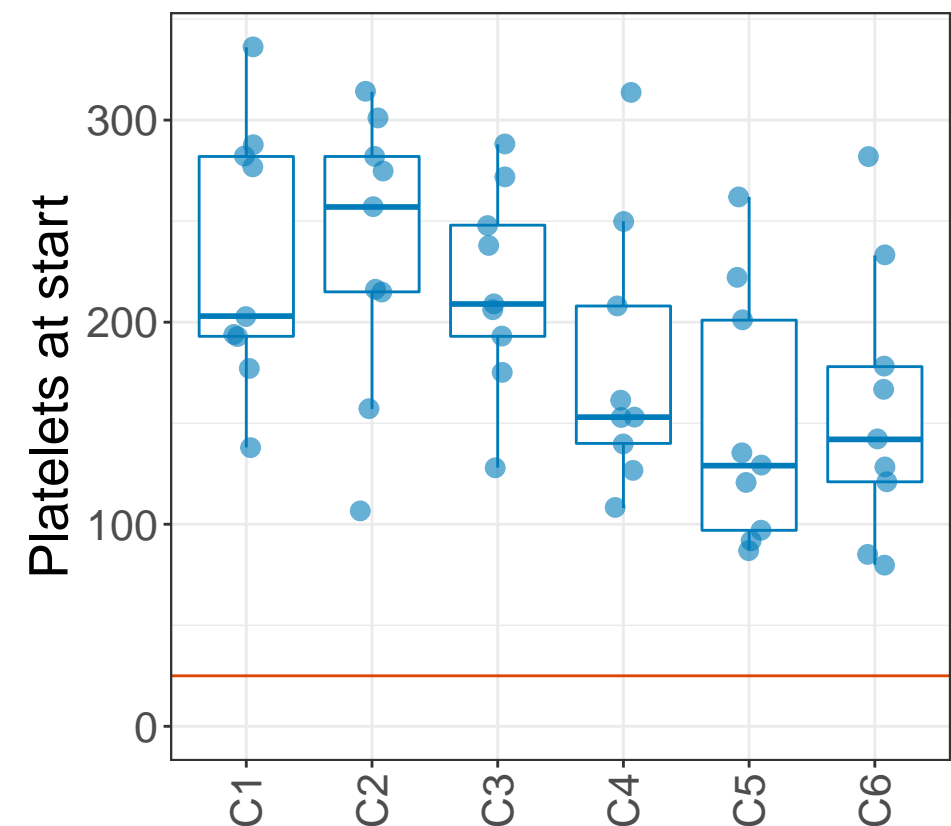**ACNS1123 Stratum 1**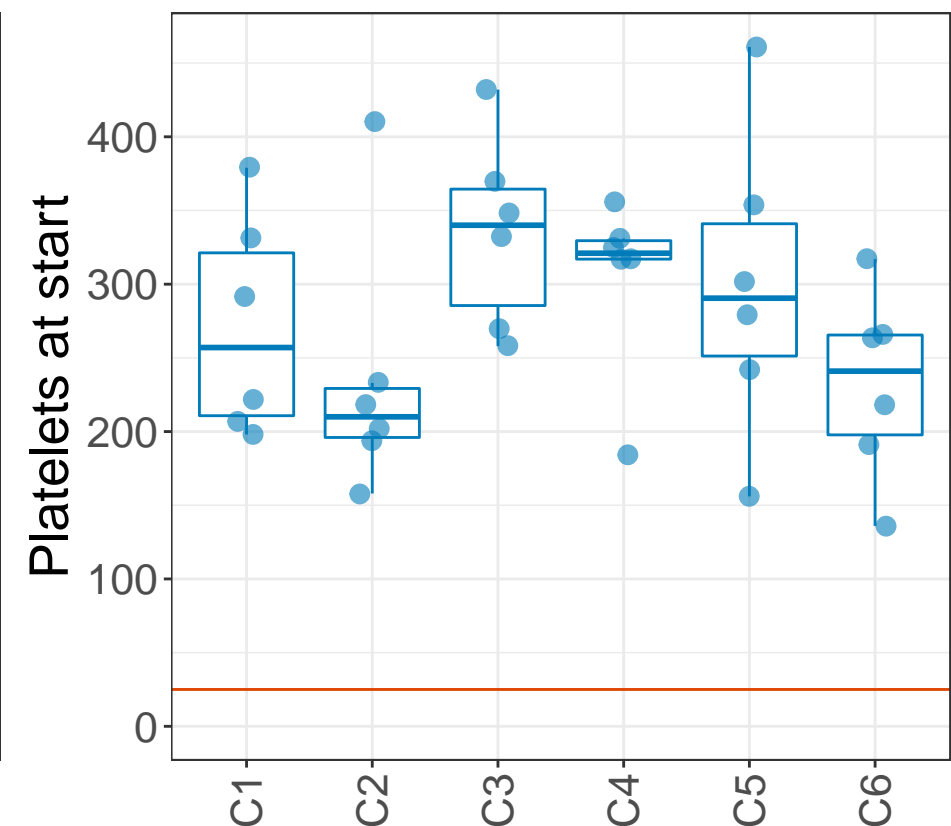**ACNS1123 Stratum 2**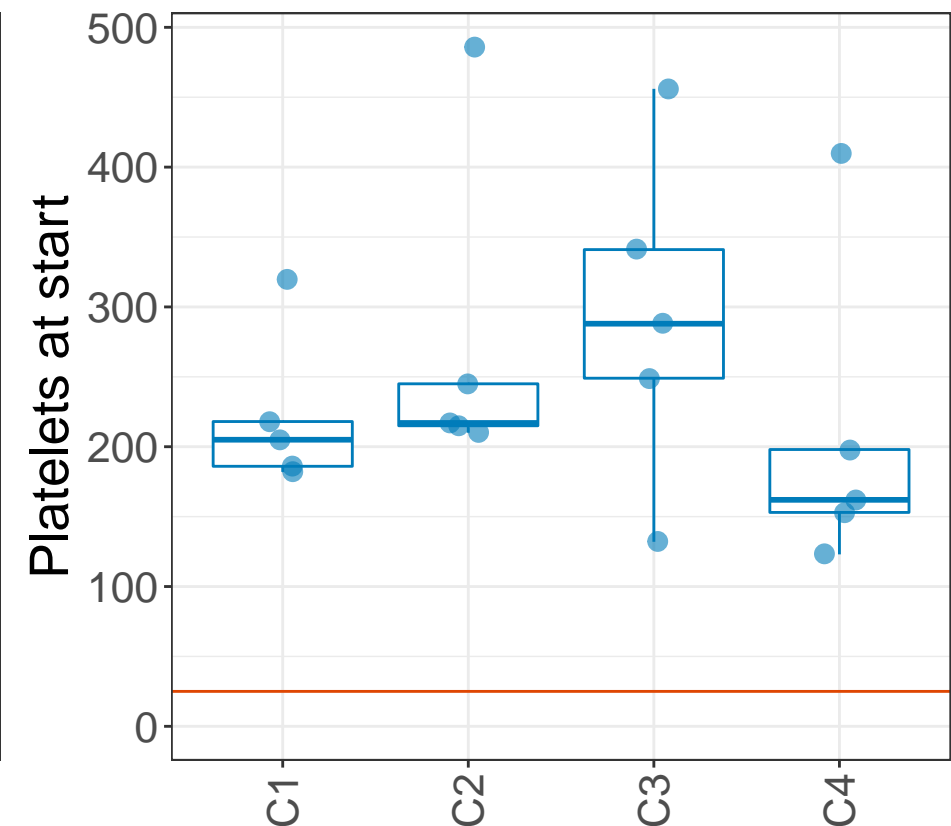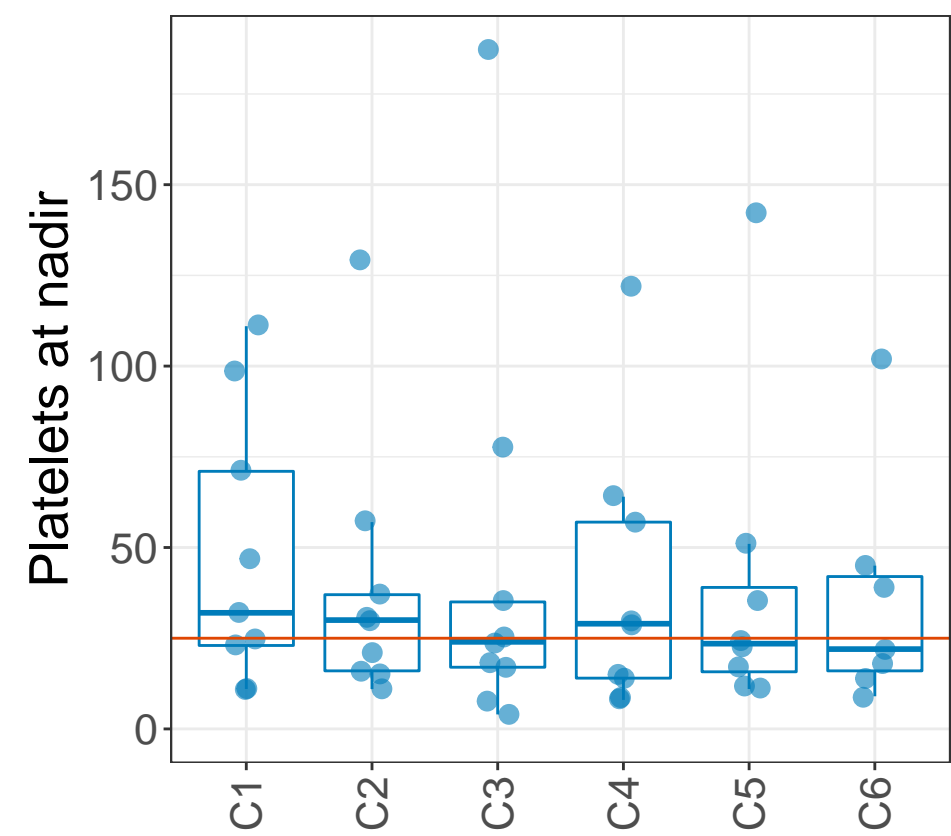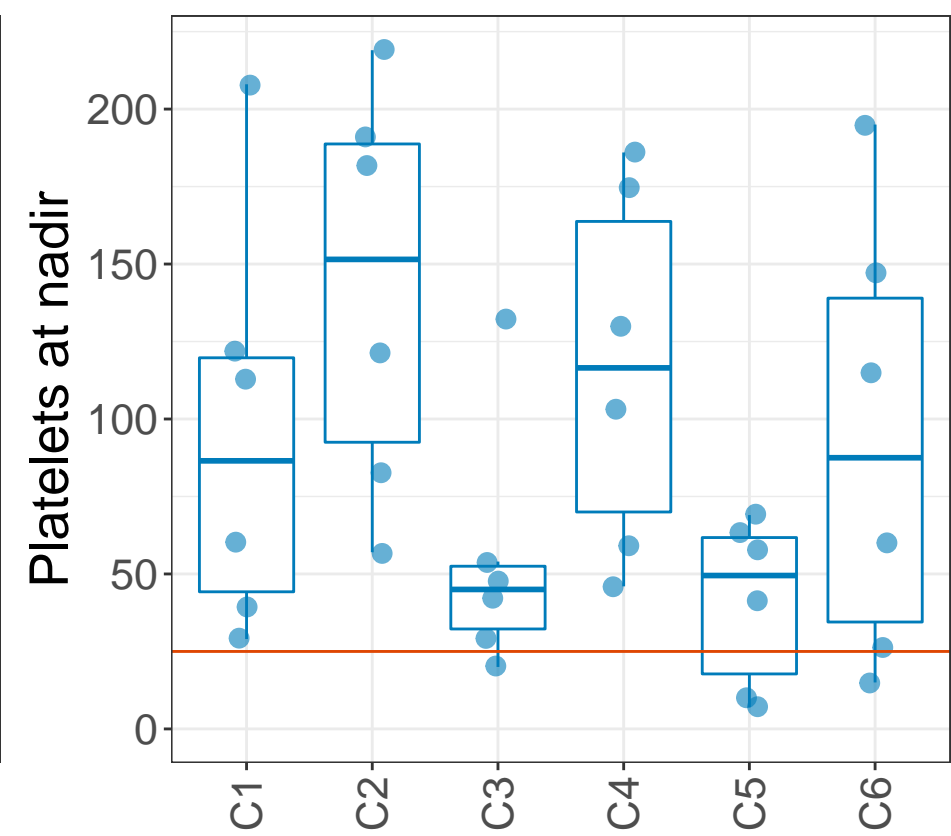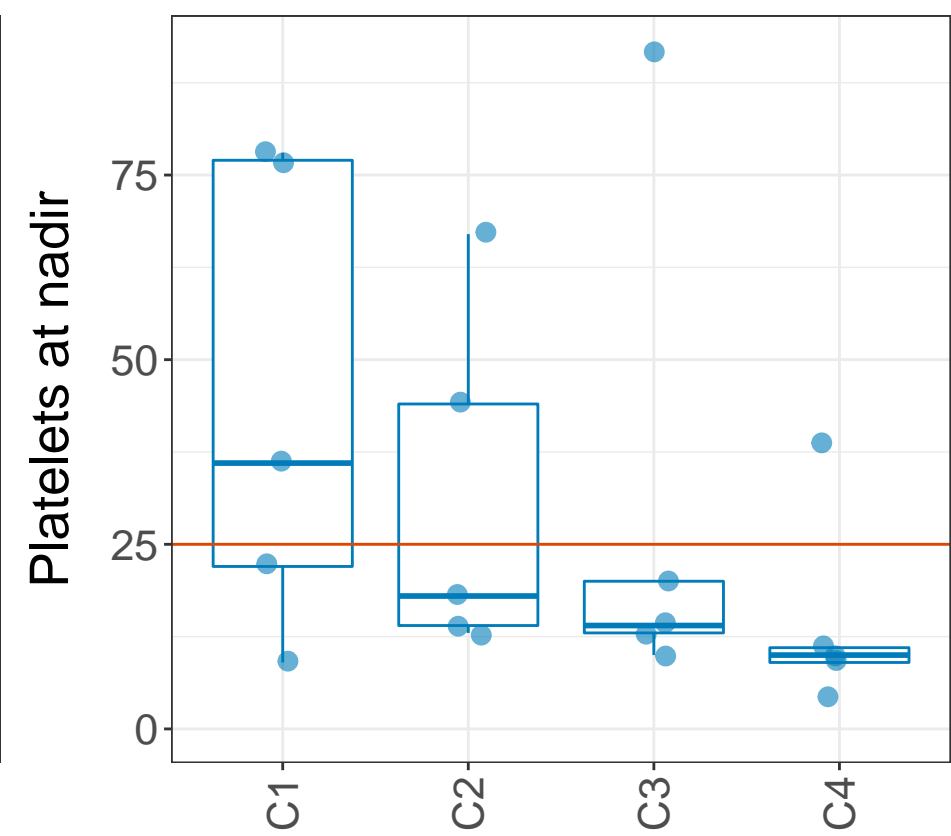**ARET0321**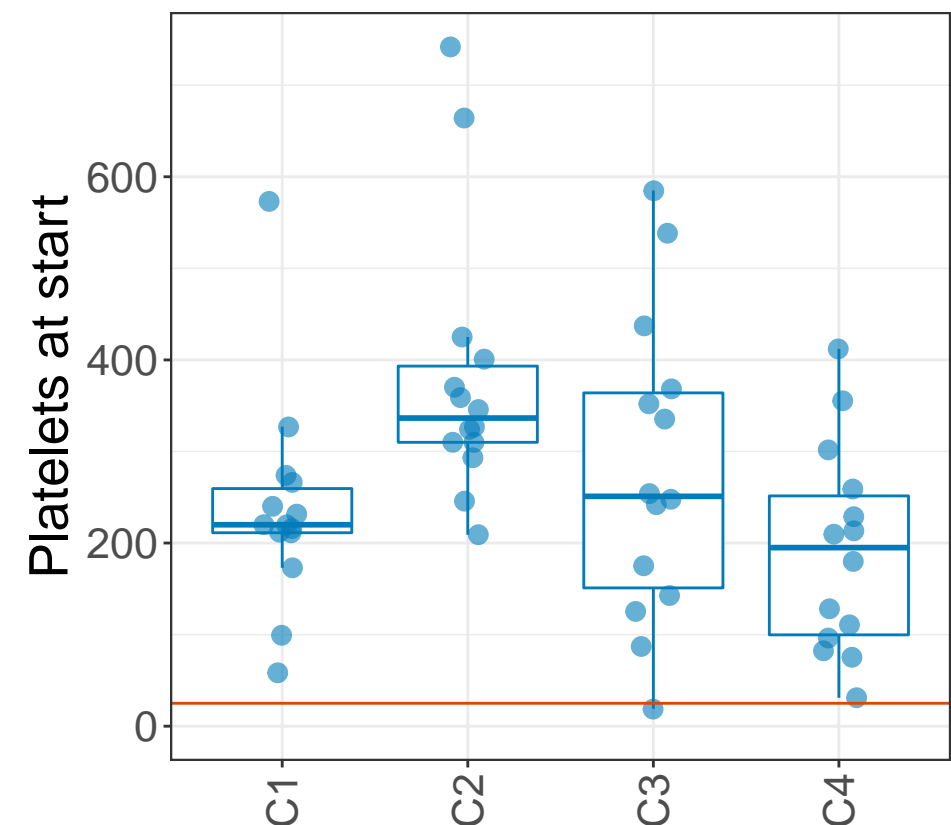**EFT**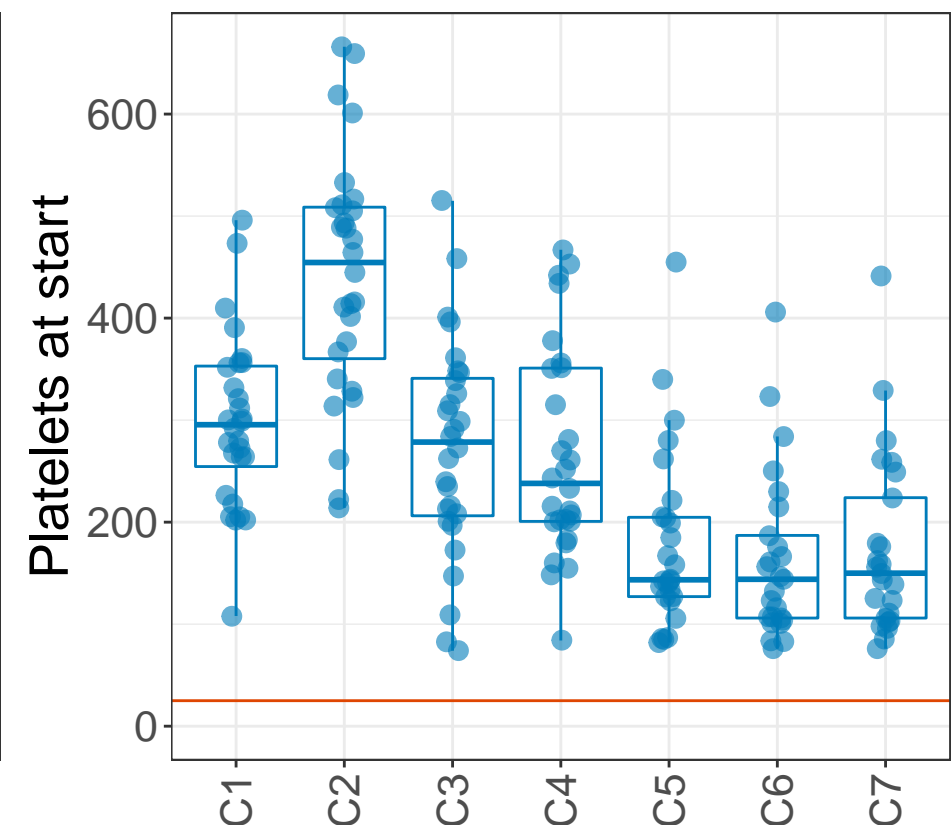**N8**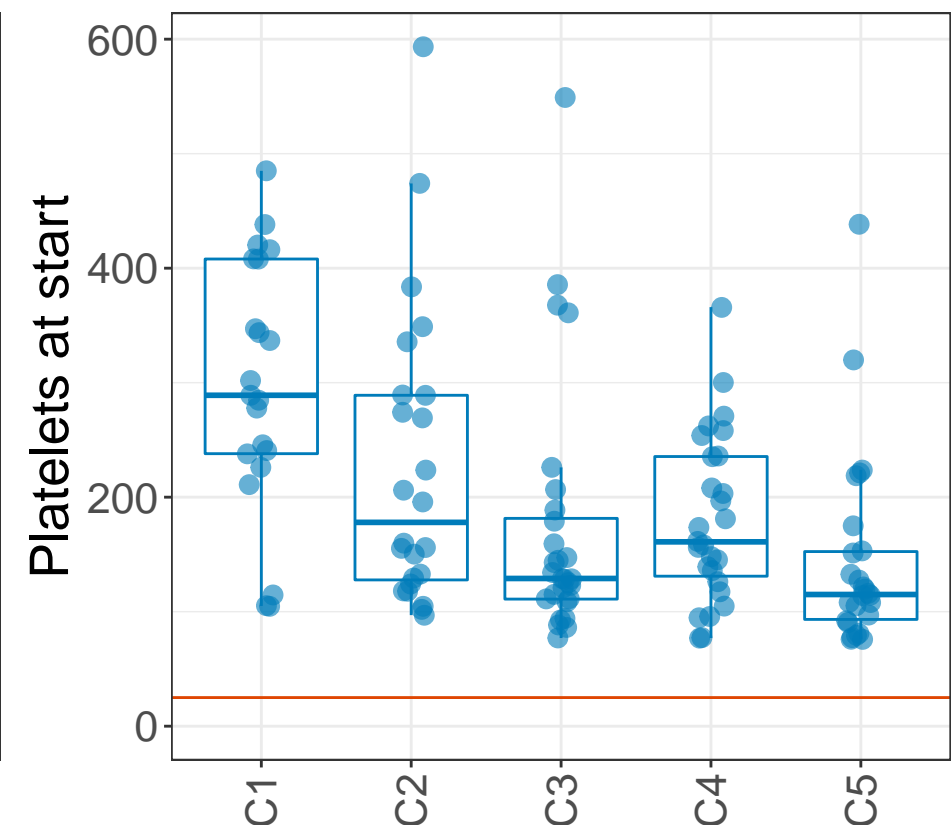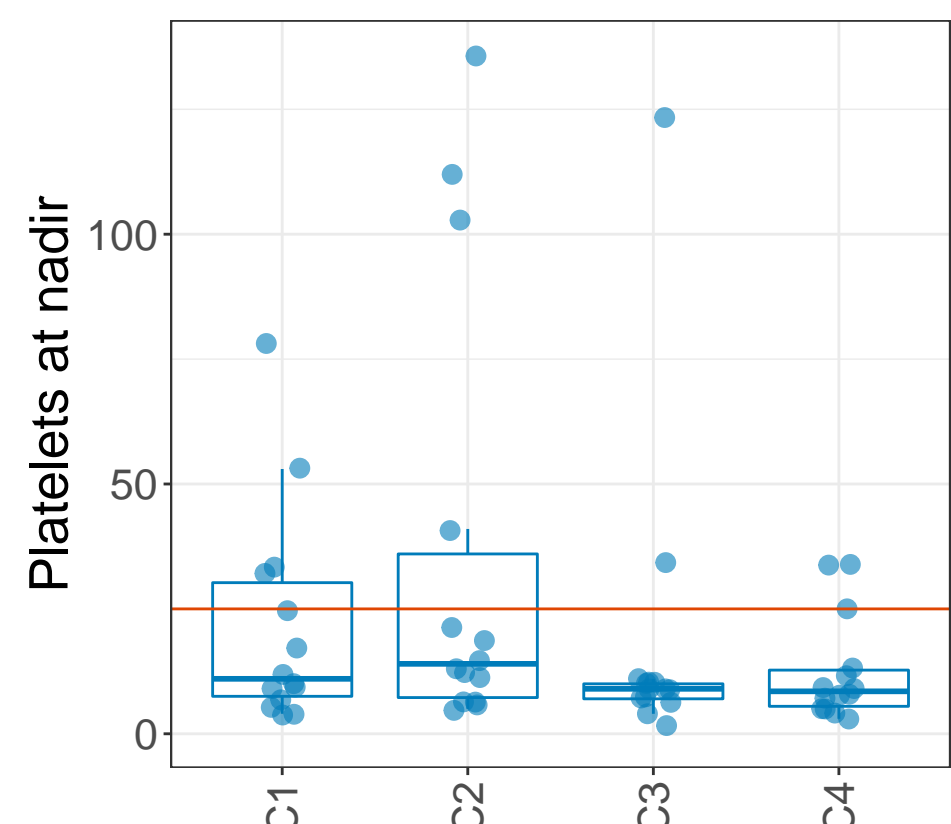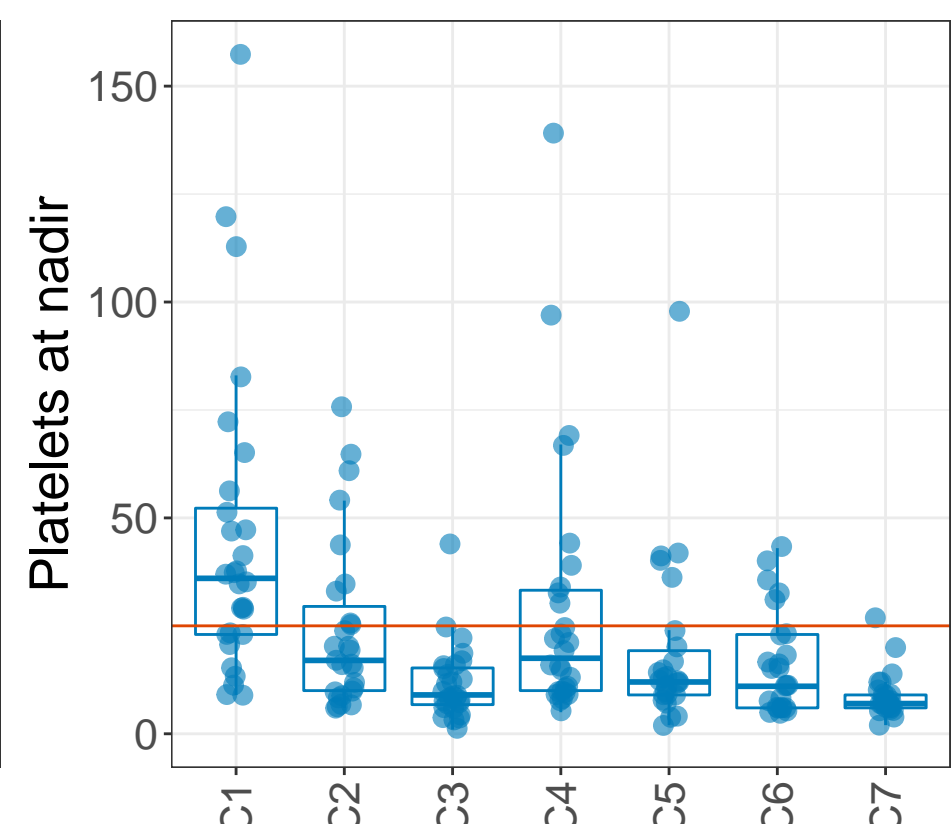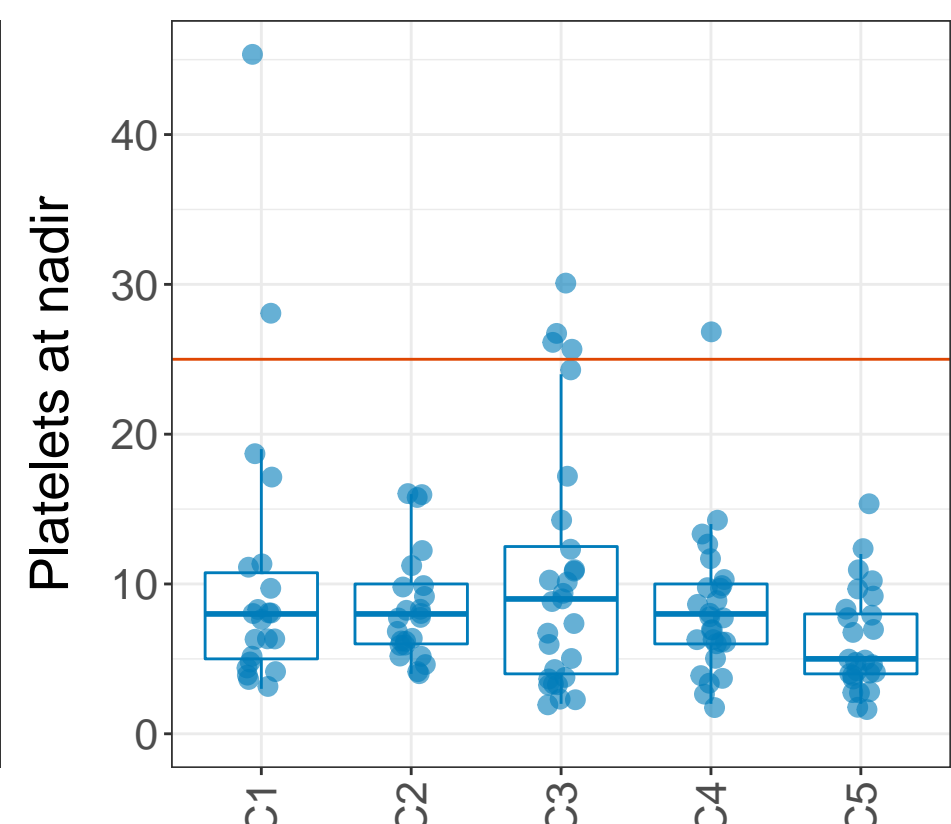

Supplement: NIHMS1803931-supplement-fS2.pdf [file NIHMS1803931-supplement-fS2.pdf]
